# Supplementary material
Source: PubMed Central journal article supplement (PMC7450794)
Supplement: blood316596-suppl1.pdf [file blood316596-suppl1.pdf]

### **CFU assay**

Colony-forming unit granulocyte-macrophage (CFU-GM), burst-forming unit erythroid cell (BFU-E) and multipotential (CFU-GEMM or CFU-Mix) progenitors were assayed in methylcellulose cultures using the specialized MethoCult<sup>®</sup> H4434 Classic medium (StemCell Technologies)<sup>1</sup>, in the presence of: GM-CSF (10 ng/mL), IL-3 (10 ng/mL), erythropoietin (3 U/mL), SCF (50 ng/mL), which was further supplemented with G-CSF (20 ng/mL) and IL-6 (20 ng/mL) (PeproTech). CFU-C were scored after 7–14 days.

1. Kobari L, Giarratana MC, Poloni A, et al. Flt3 ligand, MGDF, Epo and G-CSF enhance *ex vivo* expansion of hematopoietic cell compartments in presence of SCF, IL-3 and IL-6. *Bone Marrow Transplant*. 1998;21(8):759–767.

### **REFERENCE**

#### **Limiting dilution assay**

1. Fazekas de St Groth. The evaluation of limiting dilution assays. *J Immunol Methods*. 1982;49(2):R11–23.

**Table S1. Pool of lineage-specific PE-labeled mAbs**

| <b>Species</b> | <b>Class</b> | <b>Name</b>         | <b>Clonality</b> | <b>Vendor</b>                |
|----------------|--------------|---------------------|------------------|------------------------------|
| Mouse          | IgG1         | Anti-CD2            | Monoclonal       | Miltenyi Biotec<br>Auburn,CA |
| Mouse          | IgG1         | Anti-CD3            | Monoclonal       | Miltenyi Biotec<br>Auburn,CA |
| Mouse          | IgG1         | Anti-CD14           | Monoclonal       | Miltenyi Biotec<br>Auburn,CA |
| Mouse          | IgG1         | Anti-CD16           | Monoclonal       | Miltenyi Biotec<br>Auburn,CA |
| Mouse          | IgG1         | Anti-CD19           | Monoclonal       | Miltenyi Biotec<br>Auburn,CA |
| Mouse          | IgG1         | Anti-CD24           | Monoclonal       | Miltenyi Biotec<br>Auburn,CA |
| Mouse          | IgG1         | Anti-CD56           | Monoclonal       | Miltenyi Biotec<br>Auburn,CA |
| Mouse          | IgG1         | Anti-glycophorine A | Monoclonal       | Miltenyi Biotec<br>Auburn,CA |
| Mouse          | IgG1         | Anti-CD11c          | Monoclonal       | Miltenyi Biotec<br>Auburn,CA |
| Mouse          | IgG1         | Anti-CD66b          | Monoclonal       | Miltenyi Biotec<br>Auburn,CA |

**Table S2. Antibodies for the detection of cell surface antigen of cell obtained in LTC-HE and LTC-IC-HE cultures**

| <b>Species</b> | <b>Class</b> | <b>Name</b>               | <b>Clonality</b> | <b>Vendor</b>                  |
|----------------|--------------|---------------------------|------------------|--------------------------------|
| Mouse          | IgG1 k       | Anti-CD45-FITC            | Monoclonal       | BD Bioscience,<br>San Jose,CA  |
| Mouse          | IgG1 k       | Anti-CD33-PE              | Monoclonal       | BD Bioscience,<br>San Jose,CA  |
| Mouse          | IgG1 k       | Anti-CD56-PE              | Monoclonal       | BD Bioscience,<br>San Jose,CA  |
| Mouse          | IgG1 k       | Anti-CD105-PE             | Monoclonal       | BD Bioscience,<br>San Jose,CA  |
| Mouse          | IgG1 k       | Anti-c-kit-PE             | Monoclonal       | BD Bioscience,<br>San Jose,CA  |
| Mouse          | IgG1 k       | Anti-CXCR4-PE             | Monoclonal       | BD Bioscience,<br>San Jose,CA  |
| Mouse          | IgG1         | Anti-KDR-PE               | Monoclonal       | Sigma-Aldrich<br>Milan, Italy  |
| Mouse          | IgG1 k       | Anti-VE-Cadherin-PE       | Monoclonal       | BD Bioscience<br>San Jose, CA  |
| Mouse          | IgG1 k       | Anti-VE-Cadherin-Purified | Monoclonal       | eBioscience<br>San Diego, CA   |
| Mouse          | IgG1 k       | Anti-CD45-ECD-PETR        | Monoclonal       | Immunotech<br>Marseille,France |
| Mouse          | IgG1 k       | Anti-Nanog                | Monoclonal       | BD Bioscience<br>San Jose, CA  |
| Mouse          | IgG          | Anti-OCT4                 | Polyclonal       | Abcam, Cambridge, MA           |

**Table S3. RT-PCR oligonucleotides**

| Product                 | GeneBank number                     | Foward primer Sequence<br>5' → 3' | Reverse primer Sequence<br>5' → 3' | Optimal Temperature | Size (bp) |
|-------------------------|-------------------------------------|-----------------------------------|------------------------------------|---------------------|-----------|
| Notch1                  | NM 017617                           | ACTGTGAGGACCTGGTGGAC              | TTGTAGGTGTTGGGGAGGTC               | 56                  | 196       |
| Wnt5A <sup>(2)</sup>    | NM 003392                           | CAAGGTGGGTGATGCCCTGAAGGAG         | CGTCTGCACGGTCTTGAACCTGGTCGTA       | 64                  | 276       |
| B-Catenin               | NM 001904                           | TGCAGTTCGCCTTCACTATG              | CTGCACAAACAATGGAATGG               | 56                  | 355       |
| Bmi-1                   | NM 005180                           | AATCCCCACCTGATGTGTGT              | CATTTTGTGAAAAGCCCTGGA              | 56                  | 232       |
| Stat3                   | NM 139276<br>NM 003150<br>NM 213662 | GGAGGAGTTGCAGCAAAAAG              | TGTGTTTGTGCCCAGAATGT               | 56                  | 322       |
| Src                     | NM 005417<br>NM 198291              | CTGTTCGGAGGCTTCAACTC              | TGAGAGGCAGTAGGCACCTT               | 58                  | 384       |
| LMO2 <sup>(3)</sup>     | NM 005574                           | TACTGGCACGAGGACTGC                | CTTTCACCCGCATTGTCAT                | 56                  | 190       |
| Gata2                   | NM 032638                           | AAGGCTCGTTCCTGTTCAGA              | GCCCCTTTCTTGTCTTCTT                | 56                  | 380       |
| Gata3                   | NM 002295<br>NM 002051              | CTCATTAAGCCCAAGCGAAG              | TTTTTCGGTTTCTGGTCTGG               | 58                  | 205       |
| Gp130                   | NM 175767                           | TGGCCTAATGTTCCAGATCC              | GGACTGACGGAACCTGGTGT               | 56                  | 370       |
| SLAM<br>(CD150)         | NM 003037                           | TGTCGTCACAATGGCAAAAT              | CCCAGTATCAAGGTGCAGGT               | 56                  | 303       |
| Podocalyxin             | NM 005397                           | CCGTGGTCGTCAAAGAAATC              | GTCGTCCTTGGTCAGGTTGT               | 54                  | 428       |
| Vegfr1 <sup>(4)</sup>   | NM 002019                           | ATTCTGACGGTTTCTACAAGGAG           | TCCTGTCAGTATGGCATTGATTG            | 62                  | 580       |
| Vegfr2                  | NM 002253                           | TGATCGGAAATGACACTGGA              | TGCTTCACAGAAGACCATGC               | 58                  | 329       |
| Tie2                    | NM 000459                           | CCAAACGTGATTGACACTGG              | TCCGAGCTTGGAATATTGG                | 56                  | 362       |
| Tie1                    | NM 005424                           | GTGCCAGTGTCAGAATGGTG              | GGGCACTTTCACATTGACCT               | 58                  | 385       |
| EphB4 <sup>(5)</sup>    | NM 004444                           | CACAAAATTGGAAACTGCTGAT            | GCTGGGCGCACTTTTTGTAGAA             | 60                  | 532       |
| EphB2 <sup>(5)</sup>    | NM 004442                           | GGAAGAGGTGAGTGGCTACGAT            | TACATCCACCTCTTCCGCATTG             | 60                  | 577       |
| EphrinB2 <sup>(5)</sup> | NM 004093                           | GAAAATACCCCTCTCCTCAACT            | CTTGGACCGAGGATGTTGTTT              | 55                  | 394       |

### **Oligonucleotides used in the RT-PCR analysis**

The numbers shown in superscript indicate the reference sources of the oligonucleotide sequences. All other oligonucleotides were designed by our group.

### **REFERENCES**

1. Klimanskaya, I., Chung, Y., Becker, S., Lu, SJ., and Lanza R. (2006). Human embryonic stem cell lines derived from single blastomeres. *Nature* 444, 481–485.
2. Van Den Berg, DJ., Sharma, AK., Bruno, E., and Hoffman R. (1998). Role of Members of the *Wnt* Gene Family in Human Hematopoiesis. *Blood* 92, 3189–3202.
3. Shojaei, F., Gallacher, L., and Bhatia, M. (2004). Differential gene expression of human stem progenitor cells derived from early stages of in utero human hematopoiesis. *Blood* 103, 2530–2540.
4. Bagnard, D., Vaillant, C., Khuth, ST., Dufay, N., Lohrum, M., Puschel, AW., Belin, MF., Bolz, J., and Thomasset, N. (2001). Semaphorin 3A-Vascular Endothelial Growth Factor-165 Balance Mediates Migration and apoptosis of Neural Progenitor Cells by the Recruitment of Shared Receptor. *The Journal of Neuroscience* 21,3332–3341.
5. Salvucci, O., de la Luz Sierra, M., Martina, JA., McCormick, PJ., and Tosato, G. (2006). EphB2 and EphB4 receptors forward signaling promotes SDF-1–induced endothelial cell chemotaxis and branching remodeling. *Blood* 108, 2914–2922.

CD34<sup>-</sup>Lin<sup>-</sup>CD45<sup>+</sup>

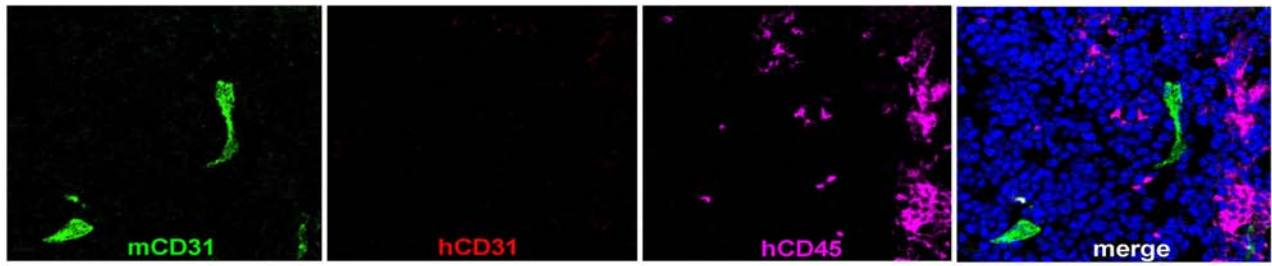

**Figure S1. MOPC315 tumor tissue from a mouse injected with CD34<sup>-</sup>Lin<sup>-</sup>CD45<sup>+</sup> cells shows vascular structures expressing mouse, but not human CD31**  
Clusters of human CD45<sup>+</sup> cells are observed.
